# Supplementary material
Source: PubMed Central journal article supplement (PMC4491158)
Supplement: Supp_Table1.pdf [file Supp_Table1.pdf]

## Supplementary Data

SUPPLEMENTARY TABLE S1. RESPIRATORY SEVERITY SCORE

| <i>Score</i> | <i>Respiratory rate<br/>(breaths/min)</i> | <i>Wheeze</i>                                                                                                        | <i>SpO<sub>2</sub></i> | <i>Accessory respiratory<br/>muscle utilization</i>                         |
|--------------|-------------------------------------------|----------------------------------------------------------------------------------------------------------------------|------------------------|-----------------------------------------------------------------------------|
| 0            | ≤ 30                                      | None                                                                                                                 | ≥ 95                   | None                                                                        |
| 1            | 31–45                                     | End expiratory only audible by stethoscope                                                                           | 90–94                  | Mild intercostal in-drawing (just visible), no head bobbing or tracheal tug |
| 1.5          |                                           | Not otherwise specified                                                                                              |                        | Not otherwise specified                                                     |
| 2            | 46–60                                     | Entire expiration and inspiration with stethoscope only                                                              | 85–89                  | Moderate amount of intercostal in-drawing, no head bobbing or tracheal tug  |
| 3            | > 60                                      | Audible without stethoscope (this may be expressed by the mother) or markedly decreased air exchange on auscultation | < 85                   | Severe intercostal in-drawing with presence of head bobbing                 |

This is a composite score ranging from 0 to 12, with a higher score indicating more severe disease, with 0–3 points each assigned to respiratory rate, wheeze, room air oxygen saturation, and accessory respiratory muscle utilization.
