# Supplementary material
Source: PubMed Central journal article supplement (PMC4491158)
Supplement: Supp_Table2.pdf [file Supp_Table2.pdf]

SUPPLEMENTARY TABLE S2. DEMOGRAPHIC CHARACTERISTICS OF 630 TERM, PREVIOUSLY HEALTHY INFANTS WITH ACUTE RESPIRATORY ILLNESS, AND THEIR MOTHERS, WHO WERE ENROLLED IN THE TENNESSEE CHILDREN'S RESPIRATORY INITIATIVE

|                                                                    | <i>LRTI (N=455; 72%)</i> | <i>URI (N=175; 28%)</i> |
|--------------------------------------------------------------------|--------------------------|-------------------------|
| <i>Baseline demographics:</i>                                      |                          |                         |
| Mother's age at infant birth in years, median (IQR)                | 26 (22, 30)              | 23 (20, 29)             |
| Insurance:                                                         |                          |                         |
| Private                                                            | 142 (31)                 | 19 (11)                 |
| Medicaid                                                           | 280 (62)                 | 148 (85)                |
| None                                                               | 33 (7)                   | 8 (5)                   |
| Infant's race:                                                     |                          |                         |
| African American                                                   | 82 (18)                  | 59 (33)                 |
| White                                                              | 277 (61)                 | 52 (30)                 |
| Hispanic                                                           | 53 (12)                  | 31 (18)                 |
| Other                                                              | 42 (9)                   | 33 (19)                 |
| Gestational age in weeks, median (IQR)                             | 39 (38, 40)              | 39 (39, 40)             |
| Infant male sex                                                    | 253 (56)                 | 99 (57)                 |
| Birth weight in grams, median (IQR)                                | 3,289 (3,005, 3,629)     | 3,345 (3,062, 3,657)    |
| Breast fed                                                         | 248 (55)                 | 108 (62)                |
| Infant in day care                                                 | 105 (23)                 | 48 (28%)                |
| No older siblings                                                  | 82 (18%)                 | 74 (42%)                |
| Mother currently smoking                                           | 143 (31)                 | 46 (27)                 |
| Maternal asthma                                                    | 85 (19)                  | 37 (21)                 |
| <i>Acute respiratory illness characteristics:</i>                  |                          |                         |
| Infant's age at time of respiratory illness in weeks, median (IQR) | 11 (6, 21)               | 23 (9.5, 39)            |
| RSV positive <sup>a</sup>                                          | 344 (76)                 | 25 (14)                 |
| RV positive <sup>a</sup>                                           | 81 (18)                  | 81 (46)                 |
| Total outpatient                                                   | 64 (14)                  | 143 (82)                |
| Total inpatient                                                    | 391 (86)                 | 32 (18)                 |
| ICU                                                                | 40 (9)                   | 0 (0)                   |
| ICU and intubated                                                  | 19 (4)                   | 0 (0)                   |
| Respiratory severity score total, median (IQR) <sup>b</sup>        | 6.5 (4, 8.5)             | 1 (0, 2)                |
| <i>Maximum location of care</i>                                    |                          |                         |
| Outpatient ( <i>n</i> =207)                                        |                          | 1 (0, 3)                |
| Inpatient ( <i>n</i> =423)                                         |                          | 6.5 (4, 9)              |
| ICU ( <i>n</i> =40)                                                |                          | 9 (7.5, 12)             |
| ICU + intubated ( <i>n</i> =19)                                    |                          | 9.5 (9, 12)             |

Unless otherwise stated, all information is presented as *N* (%).

<sup>a</sup>Includes co-infections with other viruses not included in this table.

<sup>b</sup>RSS is a 0–12-point scale, with higher score denoting more severe disease.
